# Supplementary material
Source: publisher site journal article supplement (https://www.dovepress.com/article/205350)
Supplement: Supplementary file 1 [file get_supplementary_file.php]

**Supplementary material**

**
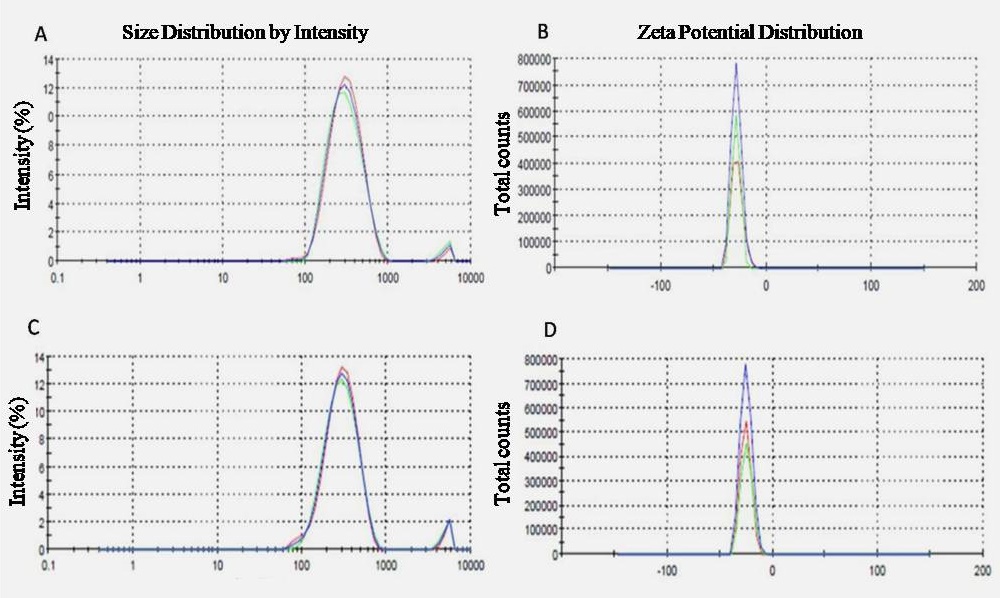
**

**Figure S1.** Distribution of mean size (A, C) and zeta potential (B, D) of alginate nanoparticles. Representative graphs for unloaded (Nano.Alg) (A, B) and miltefosine-loaded alginate nanoparticles (MFS.Alg) (C, D) are presented. Each graph depicts the results of three analyses of the same batch.


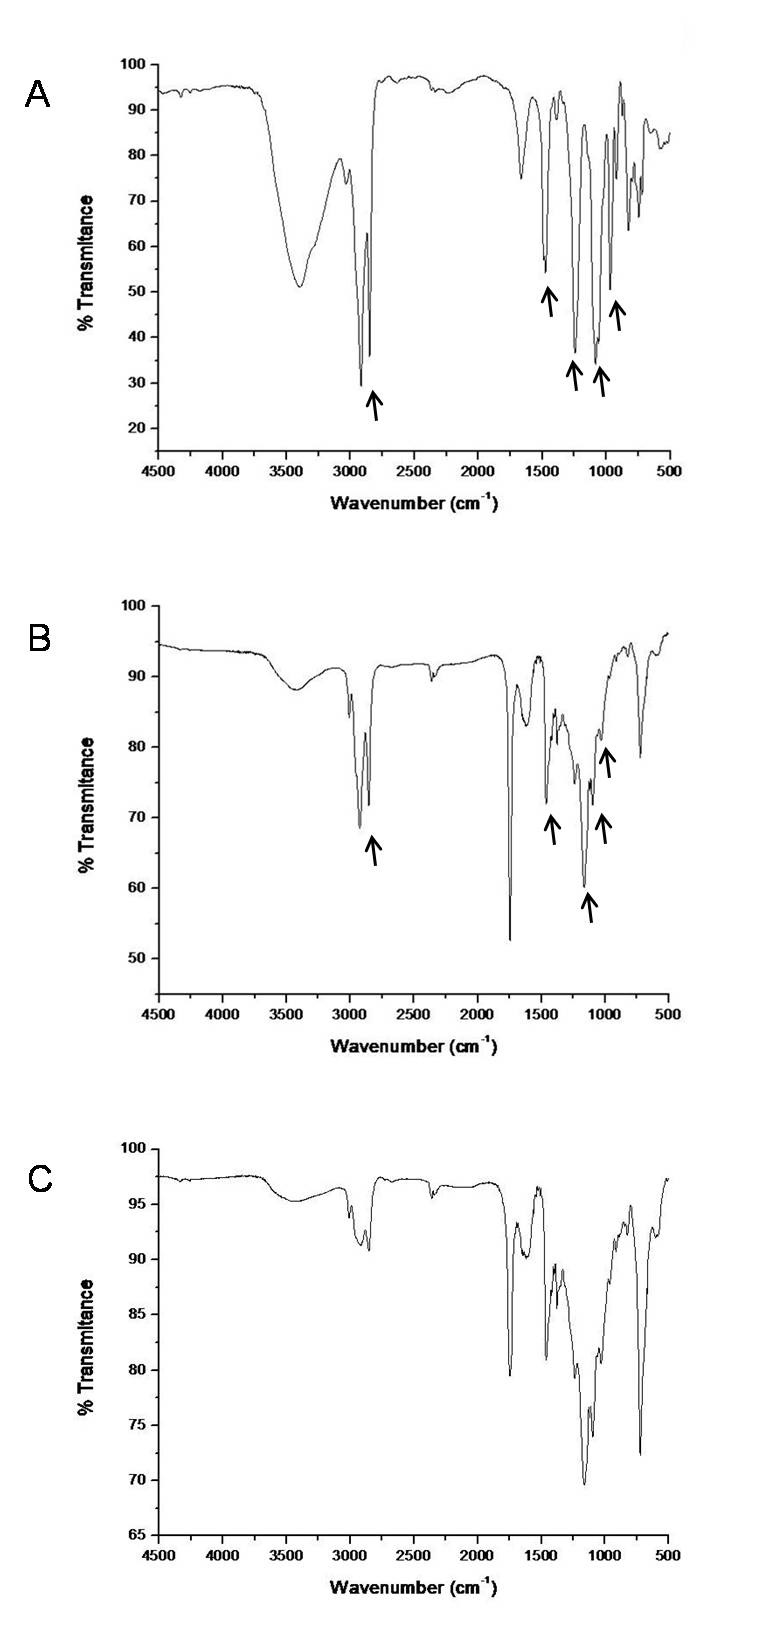


**Figure S2.** Fourier Transform Infrared Spectra. Free miltefosine (MFS) (A), miltefosine-loaded alginate nanoparticles (MFS.Alg) (B) and unloaded alginate nanoparticles (Nano.Alg) (C). Peaks marked with black arrows in panels A and B were assigned as follows: peaks at 2950–2850 cm-1 correspond to CH2 stretching in the long hexadecyl-chain, peaks at 1520–1490 cm-1 correspond to CH2 bending, and peaks at 1260–960 cm-1 correspond to the phosphocholine group. Peaks were assigned as previously published by Dorlo et al. (2012).26

**
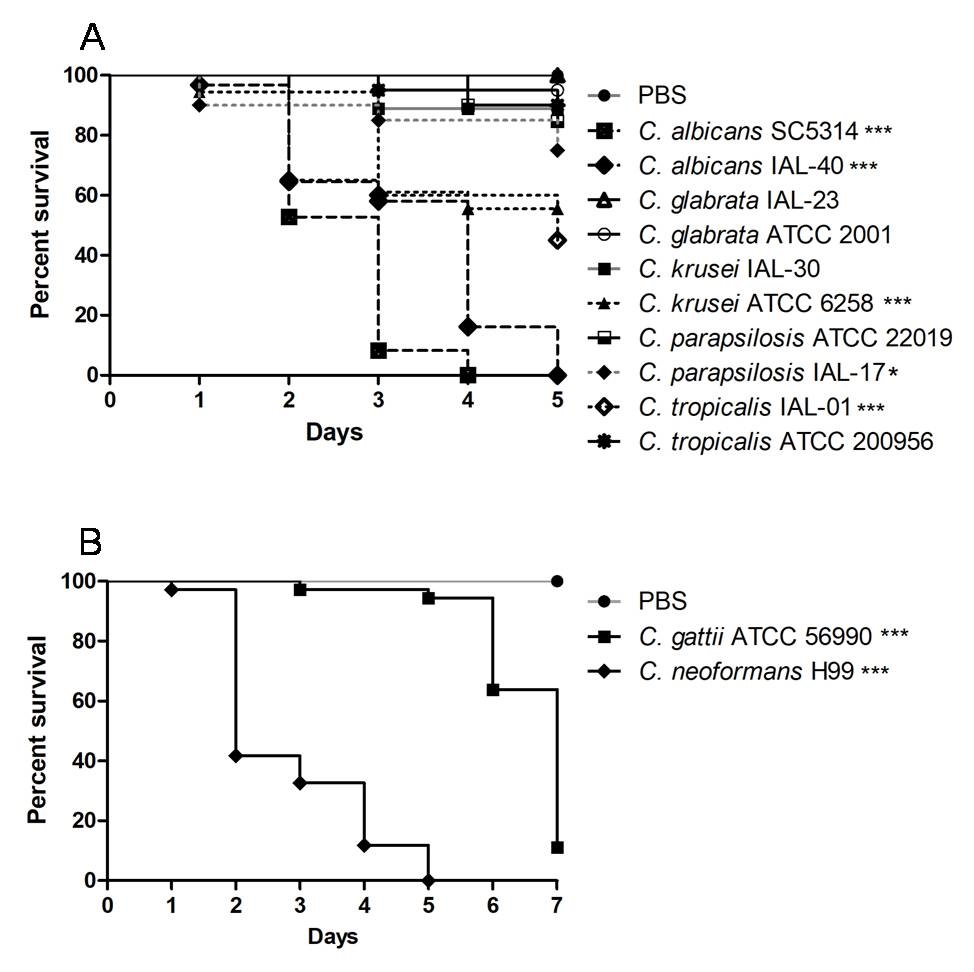
**

**Figure S3.** Virulence of yeasts in *Galleria mellonella* larvae. A: *Candida* spp. (5 x 105 CFU/larvae); B: *Cryptococcus* spp. (5 x 106 CFU/larvae). *p < 0.05 and ***p < 0.0001 when compared with the PBS group.


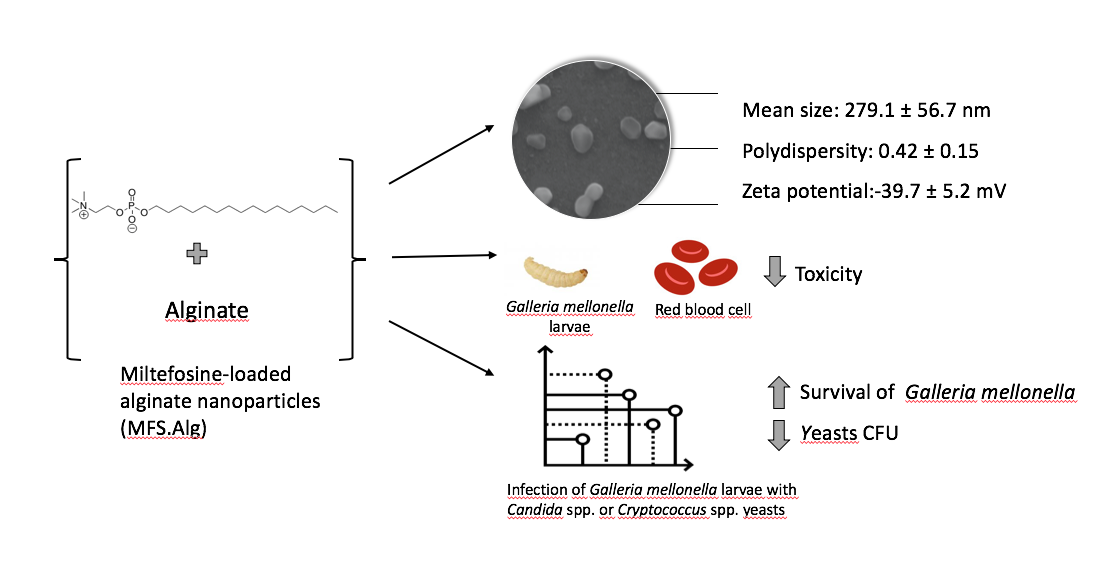


**Figure S4.** Graphical representation summarizing the work’s findings.

**Table S1.** Semi-quantitative analysis of the fungal burden, filamentation and dissemination of *Candida albicans* (SC5314 and IAL-40), *Cryptococcus neoformans* H99 and *Cryptococcus gattii* ATCC 56990 in *Galleria mellonella* larvae untreated, treated with free miltefosine (MFS), or treated with miltefosine-loaded alginate nanoparticles (MFS.Alg).

|  | **Fungal burden** | **Filamentation** | **Dissemination** |
| --- | --- | --- | --- |
| ***C. albicans* SC5314** |  |  |  |
| PBS | 0 | 0 | 0 |
| Untreated | +4 | +3 | 0 |
| MFS.Alg 200 mg/Kg | +1 | 0 | 0 |
| MFS.Alg 100 mg/Kg | +1 | 0 | 0 |
| MFS 40 mg/Kg | +2 | +2 | 0 |
| MFS 20 mg/Kg | +2 | +2 | 0 |
| MFS 10 mg/Kg | +2 | +2 | 0 |
| ***C. albicans* IAL-40** |  |  |  |
| PBS | 0 | 0 | 0 |
| Untreated | +4 | +3 | 0 |
| MFS.Alg 200 mg/Kg | +1 | 0 | 0 |
| MFS.Alg 100 mg/Kg | +2 | +2 | 0 |
| MFS 40 mg/Kg | +3 | +3 | 0 |
| MFS 20 mg/Kg | +3 | +3 | 0 |
| MFS 10 mg/Kg | +3 | +3 | 0 |
| ***C. neoformans* H99** |  | N.E |  |
| PBS | 0 |  | 0 |
| Untreated | +4 |  | +4 |
| MFS.Alg 200 mg/Kg | +3 |  | +3 |
| MFS.Alg 100 mg/Kg | +4 |  | +4 |
| MFS 40 mg/Kg | +4 |  | +4 |
| MFS 20 mg/Kg | +4 |  | +4 |
| MFS 10 mg/Kg | +4 |  | +4 |
| ***C. gattii* ATCC 56990** |  | N.E |  |
| PBS | 0 |  | 0 |
| Untreated | +4 |  | +3 |
| MFS.Alg 200 mg/Kg | +2 |  | +2 |
| MFS.Alg 100 mg/Kg | +3 |  | +2 |
| MFS 40 mg/Kg | +2 |  | +2 |
| MFS 20 mg/Kg | +3 |  | +4 |
| MFS 10 mg/Kg | +4 |  | +4 |

N.E.: not evaluated. 0: no fungal; +1: up to five fungal elements per section (standard: 5 mm punch); +2: from 6 fungal elements per section to 5 per field at high magnification (×400); +3: from 6 to 50 per field at high magnification; +4: more than 50 per field at high magnification.
